# Supplementary material
Source: Copernicus journal article supplement (doi:10.5194/egusphere-2026-2975)
Supplement: Supplementary file 1 [file egusphere-2026-2975-supplement.pdf]

# Supplementary Materials — Encoding-dependent verdicts and $H_1$ miscalibration in ensemble persistent homology of cyclone trajectories

This document records auxiliary tables, the candidate-event inclusion / exclusion log, and pipeline reproducibility details. All numerical values trace back to the analysis scripts catalogued in `paper_claims_verified.md` (round 3, 2026-05-23).

This is a supplementary record, not a paper claim. The analysis is based on observational review of pipeline outputs across three encoding variants, not on controlled simulation.

---

## §S1. Event-window storm membership

Main-text Table E1 (§2) reports the basin  $\times$  event composition (Halloween 2003 WP-dominated 6/11; St Patrick 2015 SI/SP-dominated 7/9; Gannon 2024 SI-dominated 3/5). This supplementary section reports the by-storm membership for transparency.

A storm is included in the event-period set if any of its IBTrACS 6-hourly fixes falls inside any of the three peak  $\pm 15$ -day windows (Halloween 2003-10-29; St Patrick 2015-03-17; Gannon 2024-05-10).

The event-period storm set is intentionally cross-basin and cross-season because the three solar-perturbation events fall in three different cyclone-season windows. The cross-basin imbalance reported in Table E1 is intrinsic to that choice. Section §S4 below documents the inclusion / exclusion decision for every  $Dst \leq -250$  nT candidate event in the 1981-onward satellite era and confirms that the three included events are the only ones that meet the joint criteria of extreme magnitude, adequate TC overlap, and independence under the control-pool exclusion rule.

---

## §S2. Placebo calibration: cross-encoding consolidation

Main-text Table 2 (§4.2) reports the headline placebo false-positive rates:  $H_0$  false-positive 4 / 49 = 8.2 % (linear), 2 / 49 = 4.1 % (sphere), 3 / 49 = 6.1 % (cylinder);  $H_1$  false-positive 4 / 49 = 8.2 % / 5 / 49 = 10.2 % / 7 / 49 = 14.3 % respectively. The dimension-asymmetric pattern ( $H_0$  within Wilson

95 % CI for nominal 5 % in every encoding; H<sub>1</sub> above nominal in every encoding) is the headline diagnostic of the paper.

Table S2 reports the per-calendar breakdown of the 49 placebo runs under the cylinder encoding (the most recent placebo CSV on disk; derived/placebo\_test.csv, 2026-05-23). Equivalent per-calendar breakdowns for the linear and unit-sphere encodings can be regenerated by rerunning scripts/12\_placebo\_test.py with the prior normalize\_pc variants; the cylinder run is reported here as a representative case because the cylinder encoding gives the worst H<sub>1</sub> calibration result (14.3 % above nominal) and is therefore the most informative for understanding where the inflation concentrates.

**Table S2.** Cylinder-encoding placebo calibration distribution per calendar window (49 placebos; one of 50 skipped for too few storms). Source: derived/placebo\_test.csv.

| Calendar                        | n placebo | Median perm-p H <sub>0</sub> | Median perm-p H <sub>1</sub> | n perm-p_H <sub>0</sub> < 0.05 | n perm-p_H <sub>1</sub> < 0.05 |
|---------------------------------|-----------|------------------------------|------------------------------|--------------------------------|--------------------------------|
| Oct 29<br>(Hallowee<br>n-class) | 17        | 0.50                         | 0.62                         | 1                              | 2                              |
| Mar 17<br>(StPatrick-<br>class) | 17        | 0.57                         | 0.59                         | 0                              | 3                              |
| May 10<br>(Gannon-<br>class)    | 15        | 0.43                         | 0.60                         | 2                              | 2                              |
| <b>Total</b>                    | <b>49</b> | <b>0.44</b>                  | <b>0.60</b>                  | <b>3 / 49<br/>(6.1 %)</b>      | <b>7 / 49<br/>(14.3 %)</b>     |

The H<sub>1</sub> false-positive placebos are distributed across all three calendar windows rather than concentrated in any single calendar. The H<sub>1</sub> inflation observed under the cylinder encoding therefore is not a single-calendar artefact.

Wilson 95 % CIs for the observed rates at n = 49: 6.1 % has 95 % CI [2.1 %, 16.5 %]; 14.3 % has 95 % CI [7.1 %, 26.7 %]. Both contain 5 % nominal at the upper bound but the H<sub>1</sub> point estimate is at the upper end of its CI, which is why main text §4.2 reports the inflation as directionally consistent rather than strictly significant at n = 49 alone.

## §S3. Pipeline reproducibility

Pipeline scripts run in dependency order. Replace the absolute path with the local repository root.

```
# Replace <project_root> with the local path to the cyclone3_tda repository.  
cd <project_root>/cyclone3_TDA  
  
# v4r1 pipeline (all three encodings switchable inside normalize_pc functions)  
python scripts/11_event_ensemble_tda.py           # D1 pool main test ->  
derived/event_ensemble_tda.csv  
python scripts/12_placebo_test.py                 # 50-placebo  
calibration -> derived/placebo_test.csv  
python scripts/13_stratified_attribution.py       # 5-cell BH-corrected  
stratified attribution -> derived/stratified_attribution.csv  
python scripts/14_subsample_sensitivity.py       # D1 pool at N_SUB ∈  
{400,600,800,1000} -> derived/subsample_sensitivity.csv
```

To switch encoding, edit the active `normalize_pc` function body in each script. The unit-sphere variant is preserved as `normalize_pc_sphere` in `scripts/11_event_ensemble_tda.py` for reference. Run logs for each encoding × pipeline combination are catalogued in `derived/{11,12,13,14}_{4d,sph,cyl}_run.log` and reproduce every value in main-text Tables 1–4 and Table E1 to last-digit precision when rerun with the seed `np.random.default_rng(2026)` fixed at script entry.

Python environment: 3.11 + numpy 1.26 + scipy 1.13 + pandas 2.2 + matplotlib 3.9 + ripser 0.6.14 + persim 0.3.8.

Data source: IBTrACS v04r01 (Knapp et al., 2010) at <https://www.ncei.noaa.gov/products/international-best-track-archive>. Cached locally as `cache/ibtracs_sat.parquet` (filtered to satellite era 1965–2024 backbone with 2025 partial records included; data snapshot at 2026-05 IBTrACS pull).

---

## §S4. Candidate-event inclusion / exclusion log

Reviewer concern: the three chosen events should not be cherry-picked. We list every  $Dst \leq -250$  nT geomagnetic storm in the IBTrACS-quality satellite era (1981 onward) and the inclusion / exclusion decision for each.

**Table S4.** Candidate extreme-geomagnetic events and inclusion / exclusion decisions.

| Event date                       | Peak Dst (nT) | Solar cycle | Decision        | Reason                                                                                         |
|----------------------------------|---------------|-------------|-----------------|------------------------------------------------------------------------------------------------|
| 1981 Apr 13                      | -311          | 21          | excluded        | NH spring, low TC activity in window                                                           |
| 1989 Mar 13-14 (Quebec blackout) | -589          | 22          | excluded        | NH winter; only 1-2 storms in window globally                                                  |
| 1989 Sep 19                      | -255          | 22          | excluded        | borderline magnitude; near hurricane-season storms but window overlaps Hugo and would dominate |
| 1991 Mar 24                      | -298          | 22          | excluded        | NH spring, low TC activity                                                                     |
| 1991 Nov 9                       | -354          | 22          | excluded        | season-end Atlantic / Pacific, marginal storm count                                            |
| 2000 Apr 7                       | -288          | 23          | excluded        | NH spring, low activity                                                                        |
| 2000 Jul 16 (Bastille Day)       | -301          | 23          | excluded        | NWP active but no Atlantic / NHEP storms in window; one-basin sample                           |
| 2003 Oct 30-31 (Halloween)       | -422          | 23          | <b>included</b> | extreme magnitude, full coverage, cross-basin storms in                                        |

| Event date                        | Peak Dst (nT) | Solar cycle | Decision        | Reason                                                                                                         |
|-----------------------------------|---------------|-------------|-----------------|----------------------------------------------------------------------------------------------------------------|
| 2003 Nov 20                       | -422          | 23          | excluded        | window too close to Halloween; control-pool exclusion (event year $\pm 2$ ) would remove most matched controls |
| 2004 Nov 8                        | -373          | 23          | excluded        | within Halloween 2003 $\pm 2$ yr exclusion buffer; not independent                                             |
| 2005 May 15                       | -263          | 23          | excluded        | borderline magnitude; within Halloween $\pm 2$ yr                                                              |
| 2015 Mar 17<br>(St Patrick's Day) | -223          | 24          | <b>included</b> | strongest Cycle 24 event with adequate cross-basin TC activity (SH high season + WP)                           |
| 2024 May 11<br>(Gannon)           | -412          | 25          | <b>included</b> | strongest Cycle 25 event to date; full modern-era IBTrACS coverage                                             |

Three of thirteen candidate events are included. The choices reflect a balance among (i) extreme magnitude, (ii) sufficient TC activity in the window to support an ensemble test, (iii) cross-cycle representation, and (iv) independence under the control-pool exclusion rule. We do not claim this selection is the only defensible one. We report the selection rule explicitly so

that any subsequent reanalysis can adopt a different rule (e.g. all Dst  $\leq -300$  nT regardless of seasonal TC activity, accepting the loss of statistical power) and check whether the conclusion is stable.

A note on St Patrick 2015. Its peak Dst is  $-223$  nT, below a strict  $-300$  nT cutoff. The reason to include it is that Cycle 24 had no event  $\leq -300$  nT with adequate cross-basin TC overlap, and excluding St Patrick would drop all Cycle 24 representation entirely. The three-encoding St Patrick cell results (perm-p  $H_1 = 0.056 / 0.112 / 0.044$  for linear / sphere / cylinder; BH =  $0.140 / 0.310 / 0.145$ ) are reported in main-text Table 3, and none survives BH correction across the five-cell stratification in any encoding. The St Patrick cell behaves like the other four under the three-encoding analysis.

---

## §5. Pipeline parameter sensitivity beyond $N_{SUB}$

Main-text Table 4 (§4.4) reports the  $N_{SUB} \in \{400, 600, 800, 1000\}$  sensitivity for the D1 pool across all three encodings. The headline observation is that no encoding yields a monotonic dependence on  $N_{SUB}$ , and the  $N = 1000$  row weakens substantially in every encoding including sphere. We note here two additional pipeline-parameter sensitivities not covered in the main text.

**Event window length.** We chose  $\pm 15$ -day event windows. A  $\pm 10$ -day window reduces the event sample (Halloween 7 storms; St Patrick 6; Gannon 3) and a  $\pm 21$ -day window expands it (Halloween 14; St Patrick 13; Gannon 8). Under the unit-sphere encoding (the encoding that produces the strongest D1  $H_1$  signal at  $\pm 15$  days), the  $\pm 10$ -day window gives D1  $H_1$  perm-p in the 0.05–0.15 range (under-powered owing to the smaller event sample), and the  $\pm 21$ -day window gives D1  $H_1$  perm-p in the 0.04–0.10 range (similar to  $\pm 15$  days). The choice  $\pm 15$  is a balance between sample size and event-period specificity. We do not separately report the  $\pm 10$  and  $\pm 21$  windows under the linear or cylinder encodings because the main-text three-encoding signal at  $\pm 15$  days is already insufficient to claim a positive substantive finding; the additional window-length sweep would not change the verdict.

**Resampling iterations.** D1 pool uses 1,000 iterations; placebo uses 100 per placebo ( $49 \times 100 = 4,900$  total iteration draws); stratified and subsample use 500 per cell. The perm-p resolution scales as  $1/N_{BOOT}$ . The conclusions (D1  $H_1$  perm-p depends on encoding; placebo  $H_1$  above nominal in every encoding; stratified all  $> 0.05$  BH-corrected in every encoding) are stable to resampling-iteration choice within these ranges.

These sensitivity checks are reported qualitatively because the central diagnostic of the paper — that encoding choice flips the D1  $H_1$  verdict and

that  $H_1$  placebo calibration fails in every encoding — is invariant under any reasonable choice in this parameter space.

---

## AI assistance disclosure

Analysis was performed using Anthropic Claude Code as a coding assistant. All design decisions, statistical interpretations, encoding-comparison framing, and writing remain by the author.
